# Supplementary material for: On-Demand Peptide Therapeutics for Multi-Year Space Exploration: Analysis of Clinical and Operational Relevance and Recombinant Production Feasibility
Source: Research Square preprint supplement (doi:10.21203/rs.3.rs-8701668/v1), 2026-02-24
Supplement: Supplementary file 2 [file c86c1dfbecc8e3fe0ac91e6b.xlsx]

## Sheet: Therapeutic Candidates Scores
Supplementary Data O1 - Citations Located in Supplementary Table 1					FDA Approval Status	Shelf Life	Refridgeration Requirement	Risk/Impact on HRR for Expeditionary Missions	Post Processing and Purification	# Amino Acids	Prior Recombinant Production	Easily Assayed	Dosing	Post Transcriptional Modification Required for Activity
	Based on Candidacy for On-Deman Production in Space	Excellent Candidate	2 points		FDA Approved	</12 Months	<0 C	Red Risk on HRR after mitigation	His/SNAC/MBS	< 50	With B. Subtilis	Non-cellular activity assay	<100mcg/day	0 Major PTM
		Medium Candidate	1 point		Currently in Clinical Trials or Orphan Designation	12-36 months	2-8C	Yellow on HRR after mitigation	Cellulose Binding Site	51 - 200	With E. Coli or orther prokaryote	Cellular activity assay	100-500mcg/day	1 PTM
		Poor Canddiate	0 points		Not FDA Approved an/or No Current Trials	>36 Months	Room Temperature	Green on HRR after mitigation	Tag Requiring Protease/SPPS	>200	SPPS or Eukaryotic	In vivo models	>500 mcg/day	/>2 PTM
								MA = muscle and aerobic
Pharmaceutical Name	Common/Brand Name	Function / Mechanism	Drug Class	Space Flight Pathology Interest	FDA Approval (as of 07/2025 ) & Indications	Shelf Life	Storage Requirements	Risk Vs Impact on HRR for Long Duration Missions	Post Processing and Purficiation	# Amino Acids	Prior Transgenic Production	Functional Assay	Dose for 70 kg (per administration) / Typical Course Duration / Total Amount for Course	Multi-domain/Glycosylated/ or >2 Disulfide Bonds	Operational and Clinical Relevance Score (Blue Headers) /12	Production Feasibility Score (Pink Headers) Out of 10	Total Score			Pharmaceutical Name	Function / Mechanism	Drug Class	Space Flight Pathology Interest	Operational and Clinical Relevance Score (Blue Headers) /12	Production Feasibility Score (Pink Headers) Out of 10	Total Score
Hirudin	Refludan	Direct Thrombin inhibitor	Antigocoagulant	VTE	Discontinued. Was originally FDA approved as an anticoagulation in patients with heparin-associated thrombocytopenia (HIT) & associated thromboembolic disease	36 months unopened at 20-25°C in powderized form. Do not freeze, do not store over 25°C. Use immediately after reconstitution.	20-25°C. Do not freeze, do not store over 25°C. Use immediately after reconstitution.	Risk Matrix not available - generally high degree of current concern based on current U/S VTE studies, MA- 202, CV-203	His tag with Ni-NTA purficiation and Xa thrombin cleavage with protease removal	65	Yes (e.g., E. coli, and P. Pastoris)	Yes directly with blood samples for clot formation, Chromogenic assay for ATU (Anti Thrombin Units)	>>>>500 mcg/day in recombinant production	3 disulfide bonds	5	5	10			Teriparatide	Stimulates bone formation through stimulation of osteoblastic activity	Parathyroid hormone analog	Counteract loss of bone density due to microgravity	8	9	17
Bivalrudin	Angiomax	Direct Thrombin inhibitor	Antigocoagulant	VTE	FDA Approved	48 months	2-8°C	Risk Matrix not available - generally high degree of current concern based on current U/S VTE studies, MA- 202, CV-203	SPPS	20	SPPS	Yes directly with blood samples for clot formation, Chromogenic assay for ATU (Anti Thrombin Units)	>>>>500 mcg/day production	D-Phenylalanine (D-Phe) at the N-terminus, Stereochemical modification (D-amino acid), C terminal carboxylation	5	4	9			Abaloparatide	Stimulates osteoblast activity, increasing bone density	Parathyroid hormone analog	Counteract loss of bone density due to microgravity	8	8	16
Streptokinase	Kabikinase, Streptase	Plasminogen activator producing finbrionlysis of blood clots	Injectable fibrinolytic	Emergency dissolution of blood clots	FDA approved but not in clinical use in USA. Approved very limited use in the UK. Use in developing countries	36 months unopened in powdarized form at 20-25°C	20-25°C	Risk Matrix not available - generally high degree of current concern based on current U/S VTE studies, CV-203	His tag with Ni-NTA with TEV protease cleavage, does not require His cleavage for activity but does for immunogenic purposes	440	Yes (e.g., E.coli, S. pyogenes and P. Pistoris)	Yes, Chromogenic assay for ATU	>>>500 mcg/dose/per day	0 PTM	7	6	13			Amylin (Pramlintide)	Amylin and calcitonin receptor agonist	Metabolic hormone	Counteract loss of bone density due to microgravity	8	8	16
tPA	Alteplase, Reteplase, Tenecteplase	Plasminogen activator producing finbrionlysis of blood clots	Injectable fibrinolytic	Emergency dissolution of blood clots	Approved for stroke & ST elevation myocardial infarction (STEMI)	36 months at <30°C, Up to 7 years at -80°C*** (Shaw, 2009)	20-25°C	Risk Matrix not available - generally high degree of current concern based on current U/S VTE studies, CV-203	His-tag with NI-NTA also with or without MBS	355-527	Yes in B. Subtilis but was not functionally active (Functionally active in E. coli, P. pastoris, Chinese hamster ovary (CHO) cells)	Yes, numerous (Plasmin generation, chromogenic, ELISA (PAI-1 functional), fibrinolytic	>>>>>500 mcg/day in recombinant production - 10-90mg depending on use case	Heavily Glycosylated (glycosylation not required for function) with numerous disulfide bonding (reteplase with the least at 9 DSF bonds)	7	5	12			Angiotensin II	Constricts efferent arterioles activating RAAS	Vasopressor	Hypotension	8	6	14
Eptifibatide	Eptifibatide	GPIIb/IIIa inhibitor	Antiplatelet aggregation	VTE	FDA Approved for ACS undergoing PCI	12-36 months	2-8°C	Risk Matrix not available - generally high degree of current concern based on current U/S VTE studies, MA- 202, CV-203	SPPS	7	SPPS	Yes directly with blood samples for clot formation, Chromogenic assay for ATU (Anti Thrombin Units)	180 mcg/kg intravenous (I.V.) bolus as soon as possible after diagnosis, followed by continuous infusion of 2 mcg/kg/min typically not to exceed 3 days = 12.6mg total bolus followed by 100mg cummalatively in the infusion over only 24 hours	N terminal deamination, disulfide, and C terminus amination, homoarginine	6	2	8			Daptomycin	Inhibits bacterial cell wall integrity and inhibits DNA and RNA synthesis	Antibiotic	In-flight skin infections and bacteremia	7	7	14
Factor VIII	Recombinate	Coagulation Cascade Factor	Procoagulant	Systemic Hemorrhage Control In Truama	FDA Approved for Hemophilia A	12-36 months	2-8°C	Risk of In-Mission Injury and Performance Decrements and Long-term Health Effects due to Dynamic Loads with no associated Gap	No tag - inclusion bodies without required tag	1438-2332	E. Coli but with significant post processing required	Yes directly with blood samples for clot formation, Chromogenic assay for ATU (Anti Thrombin Units)	>500 mcg/day	multiple glycosylation’s, multi domain, O linked glycosylation, tyrosine sulfation, gamma carboxylation, furin protease mediated intracellular processing	6	2	8			GLP-1 (-tide)	GLP-1 agonist, decreases cardiac remodeling, decreases gastric motility, increases insulin production	GLP-1 agonist	Cardiac Remodeling Prevention	7	7	14
Factor IIa (Topical Thrombin)	Thrombin JMI	Coagulation Cascade Factor	Procoagulant	Local Hemorrhage Control Following Trauma	FDA Approved For Topical Application for Hemorrhage Control	12-36 months	2-8°C	Risk of In-Mission Injury and Performance Decrements and Long-term Health Effects due to Dynamic Loads with no associated Gap	production with His tag in E Coli with Ni-TA purification in inclusion bodies then renatured with specific renaturing and disulfide bonding buffers	A-chain 36 amino acids, B-chain (Heavy chain) 259 amino acids	With E. Coli or orther prokaryote	Yes directly with blood samples for clot formation, Chromogenic assay for ATU (Anti Thrombin Units)	>>>500 mcg/day	1 disulfide bond formation, glycosylation on N terminus, y carboxylation	8	4	12			Granulocyte Colony-Stimulating Factor (G-CSF)	Stimulates production of granulocytes	Colony stimulating factor	Treatment of radiation-induced neutropenia, specifically in the lungs	6	8	14
Granulocyte Colony-Stimulating Factor (G-CSF)	Lenograstim, Filgrastim, Neupogen, Neulasta	Stimulates production of granulocytes	Colony stimulating factor	Treatment of radiation-induced neutropenia, specifically in the lungs	Approved for neutropenia	Up to 48 months when stored at 2-8°C prior to reconstitution) ***	2-8°C	Medium - Adverse Health Events or Long-Term Health Impacts due to Altered Immune Response IM 402, Cancer - 402,502	fast protein liquid chromatography on a QFF anion exchange column (Bashir, 2015), Ni-NTA affinity chromatography (Trinh, 2021)	175	Yes in B Subtilis	yes - NFS-60 cells linked to bioassay, other cell proliferation assays measuing neutrophil production in mice, and some JAK/STAT signaling reporter systems	35-70mcg/day/14 days/490-980mcg total (based on 5-10mcg/kg/day for typical 14 day course)	Several glysolyations that are omitted in recombinant production and not pharmacolgically relevant	6	8	14			Granulocyte-Macrophage Colony-Stimulating Factor (GM-CSF)	Stimulates proliferation & differentiation of hematopoietic progenitor cells	Colony stimulating factor	Treatment of radiation-induced lung injury	7	7	14
Granulocyte-Macrophage Colony-Stimulating Factor (GM-CSF)	Sargramostim (Leukine) Molgramostim (Molgradex)	Stimulates proliferation & differentiation of hematopoietic progenitor cells	Colony stimulating factor	Treatment of radiation-induced lung injury	Sargramostim approved for post chemotherapy, post blood or bone marrow transplantation & for acute radiation syndrome	36 months stored at 2-8C***	2-8°C	Medium - Adverse Health Events or Long-Term Health Impacts due to Altered Immune Response - IM 402, Cancer-402,502	His- and Strep- affinity chromatography tgeb Removed His and Strep tags with TEV cleavage of the His tag (Kinoshita, 2019) in silkworms	127	Yes (e.g., E. coli, P. pastoris, S. Cerevisiaesilkworm-baculovirus)	yes - Cell proliferation and receptor reporter assays	70 mcg/day/14-21 days/980-1470 mcg	Several glysolyations that are omitted in recombinant production and not pharmacolgically relevant	7	7	14			Salmon Calcitonin	Calcitonin Receptor Agonist	Bone resorption inhibitor	Counteract loss of bone density due to microgravity	7	7	14
Erythropoietin	Epoetin alfa, Epogen, Procrit	Stimulates production of erythrocytes & erythrocyte precursors in the bone marrow	Hematopoietic growth factor	Treatment of acute radiation syndrome	Approved for treatment of anemia in CKD patients, and post radiation in cancer patients	24 months with refrigeration (2-8°C)***	2-8°C	Medium - Adverse Health Events or Long-Term Health Impacts due to Altered Immune Response - IM 402	Complex multistep CEX, AEX, hydrophobicity interaction chromatagraphy. Sometimes multiple CEX for polishing. Mostly due to CHO production which is a much more complext intracellular background environment	165	Yes (e.g., CHO cells, E. coli, C. reinhardtii)	yes - ELISA and SDS-PAGE for quant and cell proliferation with luminescence reporting, most studies use mice for activity assay	8.4 mcg, 1 ug is roughly 119 IU (1000 IU / 8.4 mg ~ 119 IU/mg), several dosing protocols depending on pathology. For Patients on cancer Chemotherapy typically 150IU/kg x 3 a week or once at 450IU/Kg once a week until Hbg is restored. Often given with ferrous sulfate as well.	2 Disulfide Bonds and heavily glycosylation both of which are required for proper function	5	5	10			Insulin	Facilitates intracellular transport of glucose and K+	Metabolic hormone	None Specified	7	6	13
Romiplostim	Nplate	Increases platelet and megakaryocyte production	Thrombopoietin receptor agonist/ colony stimulating factor	Treatment of radiation induced thrombocytopenia	Approved for acute radiation induced thrombocytopenia, immune thrombocytopenic purpura (ITP)	5 years prior to reconstitution. Store in a refrigerator (2°C – 8°C). Do not freeze.***	2-8°C	Medium - Adverse Health Events or Long-Term Health Impacts due to Altered Immune Response- IM 402	His and Trx tags with Ni+ NTP purification coupled with IEX	528 (2 identical single-chain subunits of 269	Yes CHO typically, E. coli with significant post processing to facilitate disulfide bonding	yes - Cell proliferation and receptor reporter assays, neutralizing antibody bioassay	70 mcg/week/4 weeks/280 mcg	Yes - Multimer, TPO mimetic domain and Fc carrier domain, yes multiple disulfide bonds cross linking to chains of AA, Yes heavily glycosylated although which glysoylations are absolutely necessary for functionality are not well known based on literaterature review	6	4	10			Rusalatide Acetate (TP508)	Activates radioresistant stem cells & increases the stemness potential of crypts to maintain & restore intestinal integrity	Regenerative peptide	Mitigate radiation induced intestinal and colonic toxicity post radiation exposure	6	7	13
Teriparatide	Forteo	Stimulates bone formation through stimulation of osteoblastic activity	Parathyroid hormone analog	Counteract loss of bone density due to microgravity	Yes, for treatment of osteoporosis	24 months unopened in 4-8°C, 28 days once opened in 4-8°C	4-8°C, 28 days once opened in 4-8°C	High Risk Bone fracture due to bone changes in space - Bone 401, 402, MA- 202	almost all His tag purification with Ni-NTA (IMAC) for purification with protease cleavage via TEV or enterokinase	34	Yes - E. coli and B. subtilis)	yes	20 mcg/day (non weight based dosing) up to 24 months. (10950-14600mcg total over 18-24months)	None	8	9	17			Streptokinase	Plasminogen activator producing finbrionlysis of blood clots	Injectable fibrinolytic	Emergency dissolution of blood clots	7	6	13
Abaloparatide	Tymlos	Stimulates osteoblast activity, increasing bone density	Parathyroid hormone analog	Counteract loss of bone density due to microgravity	Yes, for treatment of osteoporosis	36 months at 2-8°C.	2-8°C.	High Risk Bone fracture due to bone changes in space - Bone 401, 402, MA- 202	almost all His tag purification with Ni-NTA (IMAC) for purification with protease cleavage via cyanogen bromide or enterokinase - however very few recent studies detailing the process for this specifically in PTHrp. Many more recent studies in PTH	34	Yes - E. coli	yes	80 mcg/day/28 days/2240 mcg, also not weight based dosing	None	8	8	16			Factor IIa (Topical Thrombin)	Coagulation Cascade Factor	Procoagulant	Local Hemorrhage Control Following Trauma	8	4	12
Denosumab	Prolia	antibody against RANKL	Monoclonal antibody/osteoporosis medications	Counteract loss of bone density due to microgravity	Yes, for treatment of osteoporosis	48 months	2-8°C.	High Risk Bone fracture due to bone changes in space - Bone 401, 402, MA- 202	His tag Fab fragments against RANKL most likely possible but never attempted	>1000	CHO	No	60mg every 6 months - generally this would probable beasible to produce given timeline of administration	disulfide bonding and glycosylation required for function. Multi domain	5	2	7			Glucagon	Stimulates Glycogenolysis and Gluconeogenesis	Metabolic hormone	None Specified	6	6	12
IL-11	Neumega (oprelvekin)	Stimulates production of hematopoietic stem cells resulting in increased platelet production	Thrombopoietic growth factor	Radiation protection, specifically for the gut	Discontinued. Originally FDA approved for prevention of severe thrombocytopenia & reduction of the need for platelet transfusions following myelosuppressive chemotherapy	24 months at 2-8°C	2-8°C.	Medium - Adverse Health Events or Long-Term Health Impacts due to Altered Immune Response - IM 402	Both tagged (GSH and MT Fusion) with cleavage via thrombin and enterokinase respectively. Taggless protocol post mechanical lysis also has been used.	177 (recombinant version)	Yes - E. coli	T10 expression cell lines, Megakarocyte forming colony functional assay, STAT3 siganling reporter cell lines	3,500 mcg/day/14 days/50,000 mcg	None	5	5	10			tPA	Plasminogen activator producing finbrionlysis of blood clots	Injectable fibrinolytic	Emergency dissolution of blood clots	7	5	12
IL-18BP	Tadekinig alfa	Inhibits IL-18, key protein in radiation-induced cell & tissue damage & dysfunction	Cytokine	Radiation protection	Not FDA approved. Phase III trials ongoing in 2025 for macrophage activation syndrome. Orphan designation fo rhaemophagocytic lymphohistiocytosis	6 months below -70°C. Post reconstitution, 1 week at 4°C or 3 months at -20°C.	-70°C. Post reconstitution, 1 week at 4°C or 3 months at -20°C.	Medium - Risk of Radiation Carcinogenesis - Cancer-402,502,	His tag purified with Ni-NTA, SUMO tag with SUMO protease	164	Yes (e.g., E. coli), COS-1, murine cell models	ELISA for quantity and cell models for function	>500 mcg/day	Significant glycosylation, disulfide bonding, and has a Fc binding region making it multi domain	8	3	11			ADH	Activates V1 receptors causing vasoconstriction, actives V2 receptors causing absorption of water in the collecting ducts of the nephron	Vasopressor	Hypotension	6	5	11
Rusalatide Acetate (TP508)	Chrysalin	Activates radioresistant stem cells & increases the stemness potential of crypts to maintain & restore intestinal integrity	Regenerative peptide	Mitigate radiation induced intestinal and colonic toxicity post radiation exposure	No, phase II clinical trials for radiation-induced gastrointestinal damage. Preclinical evaluation for use in radiation induced skin damage. Phase I trials for ARDS	12 months at -20°C and 24 months at -80C (MedChem) Chrysalin Biotherapeutics says up to 6 years for raw product but has no data sheet***	negative 20 to negative 80 C	Medium - Risk of Radiation Carcinogenesis - Cancer-402,502,	Solid Phase Peptide Synthesis	23	No	Several cell based functional assays, human endothelial production of nitrous oxide (NO). Functional assays for PI3/akt in adipose stem cells	<100mcg/day, 10mcg flat dose for radial fractures with good improvements in speed and quality of healing is probably the best indicator of dosing. The mice trials were several orders of magnitude higher dosing for this for the radiation trials so it is difficult to say exactly. The diabetic foot ulcer study was also only 1mcg of ointment a day for improved outcomes.	None	6	7	13			IL-18BP	Inhibits IL-18, key protein in radiation-induced cell & tissue damage & dysfunction	Cytokine	Radiation protection	8	3	11
Daptomycin	Cubicin	Inhibits bacterial cell wall integrity and inhibits DNA and RNA synthesis	Antibiotic	In-flight skin infections and bacteremia	Full-FDA approved for cutaneous and blood stream infections	3 Years at 2-8C	2-8C	Medium - Risk of Adverse In-Mission and Long-Term Health Effects and Performance Effects Due to Host-Microorganism Interactions - Micro 401 and Spaceflight-Induced Immune System Dysregulation and Microgravity-Associated Alterations in Microbial Virulence – Infectious Disease Risk for Astronauts	Proposal to produce Cubicin with His tag selected in a competition by Cubicin Pharmaceuticals, cleaved with proprietary TAGZyme DAPase cleavage with further reonstitution of the decanoic acid tail via solution phase synthesis in E. Coli, Otherwise IEX + Reverse Phase C18 Chromatography + Crystallization in S. Roseoporus	13	With E. Coli or Other	K+ based bactericidal functional assay, cell based killing with various reporters of cell killing including membrane potential assays, potassium ion release	>500 mcg/day at 4-6mg/lg/day for 7-14 days	Multi-domain, no disulfide bonding or glycosylation	7	7	14			Delta Sleep Inducing Peptide	Helps improve sleep latency	Sleep Aid	Insomnia	5	5	10
Angiotensin II	Giapreza	Constricts efferent arterioles activating RAAS	Vasopressor	Hypotension	Full FDA approval for septic shock	3 Years at 2-8C	2-8C	High Risk of Cardiovascular Adaptations Contributing to Adverse Mission Performance and Health Outcomes CV101-203	His tag of upstream angiotensinogen	8	Upstream Angiotensinogen has been produced in E. Coli (how to grade because angiotensinogen has been produced in E Coli not AngII) Ang II has only every been synthetically produced directly with eukaryotes	Antibody assays, cleavage with renin assays,	20-80mcg/kg/min for hours to days	0 Major PTM (angiotensinogen is glycosylated and has disulfide bonds)	8	6	14			Erythropoietin	Stimulates production of erythrocytes & erythrocyte precursors in the bone marrow	Hematopoietic growth factor	Treatment of acute radiation syndrome	5	5	10
Delta Sleep Inducing Peptide	DSIP	Helps improve sleep latency	Sleep Aid	Insomnia	Phase II Trials only - none since 2009.	12 months***(can't find this although I can find the storage at -80) at -80 °C, 1 month at 2-8C	<0 C	Meidum - Risk of Performance Decrements and Adverse Health Outcomes Resulting from Sleep Loss, Circadian Desynchronization, and Work Overload - Sleep 102	GST tag cleaved via thrombin	9	With E. Coli and P. Pastoris	Mice models	25 nanomoles per kilogram is equivalent to approximately 21.25 micrograms per kilogram or about 1200-1750mcg per dose per day	None	5	5	10			Hirudin	Direct Thrombin inhibitor	Antigocoagulant	VTE	5	5	10
Insulin	Many brand names	Facilitates intracellular transport of glucose and K+	Metabolic hormone	None Specified	FDA Approved	18-36 months at 2-8C. 6 Weeks at room temperature	2-8C	High Risk of Adverse Health Outcomes and Decrements in Performance Due to Medical Conditions that occur in Mission, as well as Long Term Health Outcomes Due to Mission Exposures, Med02 and Medical 101	His or SNAC tag	51	With B. Subtilis and E. Coli	In vitro and in vitro COTS functional assays available	347mcg minimum starting dose for either T2DM or hyperkalemic emergency	3 Disulfide Bonds not glycosylated and one domain, although it is comprised of two peptide chains connected by disulfide bonds	7	6	13			IL-11	Stimulates production of hematopoietic stem cells resulting in increased platelet production	Thrombopoietic growth factor	Radiation protection, specifically for the gut	5	5	10
Glucagon	GlucaGen or Ogluo	Stimulates Glycogenolysis and Gluconeogenesis	Metabolic hormone	None Specified	FDA Approved	24 months at room temperature	Room Temperature	High Risk of Adverse Health Outcomes and Decrements in Performance Due to Medical Conditions that occur in Mission, as well as Long Term Health Outcomes Due to Mission Exposures, Med02 and Medical 101	His tag, Maltose Binding Protein also used, secretion via PhoA signal peptide	51	E. Coli - significant production of GLP-1 in B. Subtilis	In vitro and in vivo COTS functional assays available (HEK 293, heptocytes)	1000mcg flat dosing for adults	No disulfide bonds, multi domain, or glycosylation	6	6	12			Romiplostim	Increases platelet and megakaryocyte production	Thrombopoietin receptor agonist/ colony stimulating factor	Treatment of radiation induced thrombocytopenia	6	4	10
Amylin (Pramlintide)	Symlin	Amylin and calcitonin receptor agonist	Metabolic hormone	Counteract loss of bone density due to microgravity	FDA Approved (pramlintide)	24 months at -80C, 12 months at -20 both of these for Cagrilintide, unknown for symlin which is probably at least 12 months at 2-8C	2-8C	High Risk Bone fracture due to bone changes in space - Bone 401, 402, MA- 202	His or SNAC tag	37	With E. Coli or Other	In vitro and in vivo COTS functional assays available (HEK 293, heptocytes)	15mcg*	one disulfide bond, a lot of aggregates in inclusion bodies that require additional post processing	8	8	16			Bivalrudin	Direct Thrombin inhibitor	Antigocoagulant	VTE	5	4	9
Salmon Calcitonin	Micalcin	Calcitonin Receptor Agonist	Bone resorption inhibitor	Counteract loss of bone density due to microgravity	FDA Approved (Miacalcin)	5 years at 2-8C	2-8C	High Risk Bone fracture due to bone changes in space - Bone 401, 402, MA- 202	His or SNAC tag	32	With E. Coli or Other	In vitro and in vivo COTS functional assays available (HEK 293, heptocytes)	16.7 mcg, and 200 IU is equivalent to 33.4 mcg	typically requires amidation, 5 tandem repeats without amidation is biologically active in mice	7	7	14			Eptifibatide	GPIIb/IIIa inhibitor	Antiplatelet aggregation	VTE	6	2	8
ADH	Vasopressin	Activates V1 receptors causing vasoconstriction, actives V2 receptors causing absorption of water in the collecting ducts of the nephron	Vasopressor	Hypotension	FDA Approved for infusion in Hypotension	24 months	2-8C	High Risk of Cardiovascular Adaptations Contributing to Adverse Mission Performance and Health Outcomes CV101-203	SPPS	9	SPPS and Wheat Germ	Yes - numerous cell based GPCR functional assays	Maximum of 0.1U/min flat dosing for cardiogenic or 0.07U for septic shock. Or max of 0.2mcg/min. Generally puts this in the favorable category.	1 disulfide bond, C-terminal amidation of the terminal glycine residue	6	5	11			Factor VIII	Coagulation Cascade Factor	Procoagulant	Systemic Hemorrhage Control In Truama	6	2	8
GLP-1 (-tide)	Semaglutide, exenatide, liraglutide	GLP-1 agonist, decreases cardiac remodeling, decreases gastric motility, increases insulin production	GLP-1 agonist	Cardiac Remodeling Prevention	FDA Improved for T2 Diabetes Mellitus	12-36 months	Room Temperature	High Risk of Cardiovascular Adaptations Contributing to Adverse Mission Performance and Health Outcomes CV101-203	His or SNAC tag	30	With B. Subtilis	Cellular activity assay	~200mcg/day (1.5mg once a week)	Amidation	7	7	14			Denosumab	antibody against RANKL	Monoclonal antibody/osteoporosis medications	Counteract loss of bone density due to microgravity	5	2	7

## Sheet: Sensitivity and Cronbach
Supplementary Data 01					OCR Cronbach's alpha	-1.03405				RPF Cronbach's alpha	0.272708
Pharmaceutical Name					FDA Approval (as of 07/2025 ) & Indications	Shelf Life	Storage Requirements	Risk Vs Impact on HRR for Long Duration Missions	Post Processing and Purficiation	# Amino Acids	Prior Transgenic Production	Functional Assay	Dose for 70 kg (per administration) / Typical Course Duration / Total Amount for Course	Multi-domain/Glycosylated/ or >2 Disulfide Bonds	Operational and Clinical Relevance Score (Blue Headers) /12	Production Feasibility Score (Pink Headers) Out of 10	Total Score	Without Regulatory Approval	Without Shelf Life	Without Storage Requirements	Without RIS Score	Without Post Processing	Total Without Regulatory Approval	Total Without Shelf Life	Total Without Storage Requirements	Total Without RIS Score	Total Without Post Processing	Ranking Without Regulatory Approval	Ranking Without Shelf Life	Ranking Without Storage Requirements	Ranking Without RIS Score	Ranking Without Post Processing	Without # Amino Acids	Without Prior Transgenic Production	Without Functional Assay	Without Dose for 70 kg (per administration) / Typical Course Duration / Total Amount for Course	Without Multi-domain/Glycosylated/ or >2 Disulfide Bonds	Total Without # Amino Acids	Total Without Prior Transgenic Production	Total Without Functional Assay	Total Without Dose for 70 kg (per administration) / Typical Course Duration / Total Amount for Course	Total Without Multi-domain/Glycosylated/ or >2 Disulfide Bonds	Ranking Without # Amino Acids	Ranking Without Prior Transgenic Production	Ranking Without Functional Assay	Ranking Without Dose for 70 kg (per administration) / Typical Course Duration / Total Amount for Course	Ranking Without Multi-domain/Glycosylated/ or >2 Disulfide Bonds
Hirudin					0	1	0	2	2	1	1	2	0	1	5	5	10	5	4	5	3	3	10	9	10	8	8	Teriparatide	Teriparatide	Teriparatide	Teriparatide	Teriparatide	4	4	3	5	4	9	9	8	10	9	Amylin (Pramlintide)	Amylin (Pramlintide)	Amylin (Pramlintide)	Teriparatide	Amylin (Pramlintide)
Bivalrudin					2	0	1	2	0	2	0	2	0	0	5	4	9	3	5	4	3	5	7	9	8	7	9	Abaloparatide	Abaloparatide	Abaloparatide	Abaloparatide	Abaloparatide	2	4	2	4	4	7	9	7	9	9	Teriparatide	Abaloparatide	Teriparatide	Abaloparatide	Teriparatide
Streptokinase					2	1	0	2	2	1	1	2	0	2	7	6	13	5	6	7	5	5	11	12	13	11	11	Amylin (Pramlintide)	Amylin (Pramlintide)	Amylin (Pramlintide)	Amylin (Pramlintide)	Amylin (Pramlintide)	5	5	4	6	4	12	12	11	13	11	Abaloparatide	Teriparatide	Abaloparatide	Amylin (Pramlintide)	Abaloparatide
tPA					2	1	0	2	2	0	2	2	0	1	7	5	12	5	6	7	5	5	10	11	12	10	10	Angiotensin II	Granulocyte Colony-Stimulating Factor (G-CSF)	GLP-1 (-tide)	Daptomycin	Rusalatide Acetate (TP508)	5	3	3	5	4	12	10	10	12	11	Angiotensin II	Angiotensin II	Angiotensin II	Angiotensin II	GLP-1 (-tide)
Eptifibatide					2	1	1	2	0	0	0	2	0	0	6	2	8	4	5	5	4	6	6	7	7	6	8	Daptomycin	Salmon Calcitonin	Angiotensin II	Granulocyte Colony-Stimulating Factor (G-CSF)	Angiotensin II	2	2	0	2	2	8	8	6	8	8	Daptomycin	Daptomycin	GLP-1 (-tide)	Daptomycin	Insulin
Factor VIII					2	1	1	2	0	0	0	2	0	0	6	2	8	4	5	5	4	6	6	7	7	6	8	GLP-1 (-tide)	Angiotensin II	Daptomycin	Granulocyte-Macrophage Colony-Stimulating Factor (GM-CSF)	Daptomycin	2	2	0	2	2	8	8	6	8	8	GLP-1 (-tide)	Rusalatide Acetate (TP508)	Salmon Calcitonin	GLP-1 (-tide)	Salmon Calcitonin
Factor IIa (Topical Thrombin)					2	1	1	2	2	1	1	2	0	0	8	4	12	6	7	7	6	6	10	11	11	10	10	Granulocyte Colony-Stimulating Factor (G-CSF)	Daptomycin	Granulocyte Colony-Stimulating Factor (G-CSF)	Angiotensin II	GLP-1 (-tide)	3	3	2	4	4	11	11	10	12	12	Granulocyte Colony-Stimulating Factor (G-CSF)	Salmon Calcitonin	Daptomycin	Streptokinase	Angiotensin II
Granulocyte Colony-Stimulating Factor (G-CSF)					2	0	1	1	2	1	2	1	1	2	6	8	14	4	6	5	5	4	12	14	13	13	12	Granulocyte-Macrophage Colony-Stimulating Factor (GM-CSF)	GLP-1 (-tide)	Granulocyte-Macrophage Colony-Stimulating Factor (GM-CSF)	GLP-1 (-tide)	Granulocyte Colony-Stimulating Factor (G-CSF)	6	5	6	6	5	12	11	12	12	11	Granulocyte-Macrophage Colony-Stimulating Factor (GM-CSF)	GLP-1 (-tide)	Granulocyte Colony-Stimulating Factor (G-CSF)	Factor IIa (Topical Thrombin)	Daptomycin
Granulocyte-Macrophage Colony-Stimulating Factor (GM-CSF)					2	1	1	1	2	1	1	1	1	2	7	7	14	5	6	6	6	5	12	13	13	13	12	Rusalatide Acetate (TP508)	Granulocyte-Macrophage Colony-Stimulating Factor (GM-CSF)	Salmon Calcitonin	Insulin	Granulocyte-Macrophage Colony-Stimulating Factor (GM-CSF)	5	5	5	5	4	12	12	12	12	11	Salmon Calcitonin	Granulocyte-Macrophage Colony-Stimulating Factor (GM-CSF)	Granulocyte-Macrophage Colony-Stimulating Factor (GM-CSF)	Glucagon	Factor IIa (Topical Thrombin)
Erythropoietin					2	1	1	1	0	1	1	1	1	0	5	5	10	3	4	4	4	5	8	9	9	9	10	Salmon Calcitonin	Insulin	Streptokinase	Rusalatide Acetate (TP508)	Salmon Calcitonin	3	3	3	3	4	8	8	8	8	9	Streptokinase	Streptokinase	Insulin	Granulocyte Colony-Stimulating Factor (G-CSF)	ADH
Romiplostim					2	0	1	1	2	0	1	1	1	0	6	4	10	4	6	5	5	4	8	10	9	9	8	Insulin	Streptokinase	Glucagon	Salmon Calcitonin	ADH	3	2	2	2	3	9	8	8	8	9	tPA	ADH	Rusalatide Acetate (TP508)	Granulocyte-Macrophage Colony-Stimulating Factor (GM-CSF)	Granulocyte Colony-Stimulating Factor (G-CSF)
Teriparatide					2	1	1	2	2	2	2	1	1	2	8	9	17	6	7	7	6	6	15	16	16	15	15	Streptokinase	Factor IIa (Topical Thrombin)	Insulin	Glucagon	Insulin	6	6	7	7	6	14	14	15	15	14	Factor IIa (Topical Thrombin)	Factor IIa (Topical Thrombin)	Glucagon	Insulin	Granulocyte-Macrophage Colony-Stimulating Factor (GM-CSF)
Abaloparatide					2	1	1	2	2	2	1	1	1	2	8	8	16	6	7	7	6	6	14	15	15	14	14	Delta Sleep Inducing Peptide	Glucagon	tPA	Streptokinase	Streptokinase	5	6	6	6	5	13	14	14	14	13	Insulin	Glucagon	Streptokinase	Salmon Calcitonin	IL-18BP
Denosumab					2	0	1	2	0	0	0	0	1	0	5	2	7	3	5	4	3	5	5	7	6	5	7	Factor IIa (Topical Thrombin)	Rusalatide Acetate (TP508)	Factor IIa (Topical Thrombin)	Factor IIa (Topical Thrombin)	Delta Sleep Inducing Peptide	1	1	1	0	1	6	6	6	5	6	Rusalatide Acetate (TP508)	Granulocyte Colony-Stimulating Factor (G-CSF)	ADH	tPA	Rusalatide Acetate (TP508)
IL-11					0	1	1	1	2	1	1	1	0	2	5	5	10	5	4	4	4	3	10	9	9	9	8	Glucagon	tPA	Rusalatide Acetate (TP508)	IL-18BP	Erythropoietin	4	4	4	5	3	9	9	9	10	8	Glucagon	Insulin	Delta Sleep Inducing Peptide	IL-18BP	Streptokinase
IL-18BP					1	2	2	1	2	1	1	1	0	0	8	3	11	7	6	6	7	6	10	9	9	10	9	Hirudin	ADH	ADH	tPA	Factor IIa (Topical Thrombin)	2	2	2	3	3	10	10	10	11	11	IL-18BP	IL-18BP	Factor IIa (Topical Thrombin)	Rusalatide Acetate (TP508)	tPA
Rusalatide Acetate (TP508)					1	2	2	1	0	2	0	1	2	2	6	7	13	5	4	4	5	6	12	11	11	12	13	IL-11	Romiplostim	Hirudin	ADH	Glucagon	5	7	6	5	5	11	13	12	11	11	ADH	tPA	IL-18BP	Delta Sleep Inducing Peptide	Glucagon
Daptomycin					2	1	1	1	2	2	1	2	0	2	7	7	14	5	6	6	6	5	12	13	13	13	12	IL-18BP	Bivalrudin	Erythropoietin	Delta Sleep Inducing Peptide	tPA	5	6	5	7	5	12	13	12	14	12	Hirudin	Bivalrudin	tPA	Hirudin	Bivalrudin
Angiotensin II					2	1	1	2	2	2	1	1	0	2	8	6	14	6	7	7	6	6	12	13	13	12	12	tPA	Erythropoietin	IL-11	Erythropoietin	Bivalrudin	4	5	5	6	4	12	13	13	14	12	IL-11	Delta Sleep Inducing Peptide	IL-11	IL-11	Erythropoietin
Delta Sleep Inducing Peptide					0	2	2	1	0	2	1	0	0	2	5	5	10	5	3	3	4	5	10	8	8	9	10	ADH	Hirudin	IL-18BP	IL-11	IL-18BP	3	4	5	5	3	8	9	10	10	8	Romiplostim	Hirudin	Erythropoietin	ADH	Hirudin
Insulin					2	1	1	1	2	2	2	1	1	0	7	6	13	5	6	6	6	5	11	12	12	12	11	Erythropoietin	IL-11	Romiplostim	Romiplostim	Eptifibatide	4	4	5	5	6	11	11	12	12	13	Delta Sleep Inducing Peptide	IL-11	Hirudin	Bivalrudin	Romiplostim
Glucagon					2	1	0	1	2	2	1	1	0	2	6	6	12	4	5	6	5	4	10	11	12	11	10	Romiplostim	IL-18BP	Bivalrudin	Hirudin	Factor VIII	4	5	5	6	4	10	11	11	12	10	Eptifibatide	Eptifibatide	Romiplostim	Eptifibatide	Delta Sleep Inducing Peptide
Amylin (Pramlintide)					2	1	1	2	2	2	1	1	2	2	8	8	16	6	7	7	6	6	14	15	15	14	14	Bivalrudin	Delta Sleep Inducing Peptide	Delta Sleep Inducing Peptide	Bivalrudin	Hirudin	6	7	7	6	6	14	15	15	14	14	Erythropoietin	Erythropoietin	Bivalrudin	Erythropoietin	Eptifibatide
Salmon Calcitonin					2	0	1	2	2	2	1	1	2	1	7	7	14	5	7	6	5	5	12	14	13	12	12	Eptifibatide	Denosumab	Eptifibatide	Eptifibatide	IL-11	5	6	6	5	6	12	13	13	12	13	Factor VIII	Factor VIII	Denosumab	Factor VIII	Factor VIII
ADH					2	1	1	2	0	2	0	1	2	0	6	5	11	4	5	5	4	6	9	10	10	9	11	Factor VIII	Eptifibatide	Factor VIII	Factor VIII	Romiplostim	3	5	4	3	5	9	11	10	9	11	Bivalrudin	Romiplostim	Eptifibatide	Romiplostim	IL-11
GLP-1 (-tide)					2	1	0	2	2	2	2	1	1	1	7	7	14	5	6	7	5	5	12	13	14	12	12	Denosumab	Factor VIII	Denosumab	Denosumab	Denosumab	5	5	6	6	6	12	12	13	13	13	Denosumab	Denosumab	Factor VIII	Denosumab	Denosumab
